1 **Expression variations in Ectodysplasin-A gene (*eda*) may contribute to**  
2 **morphological divergence of scales in Haplochromine cichlids**

3

4 **Authors**

5 Maximilian Wagner<sup>1,2\*</sup>

6 Email: maximilian.wagner@uni-graz.at

7

8 Sandra Bračun<sup>1\*</sup>

9 Email: sandra.bracun@uni-graz.at

10

11 Anna Duenser<sup>1</sup>,

12 Email: anna.duenser@gmail.com

13

14 Christian Sturmbauer<sup>1</sup>,

15 Email: christian.sturmbauer@uni-graz.at

16

17 Wolfgang Gessl<sup>1</sup>,

18 Email: wolfgang.gessl@uni-graz.at

19

20 Ehsan Pashay Ahi<sup>1,3</sup>,

21 Email: ehsan.pashayahi@helsinki.fi

22

23

24 1. Institute of Biology, University of Graz, Universitätsplatz 2, A-8010 Graz, Austria.

25

26 2. Department of Biology, University of Antwerp, Groenenborgerlaan 171, 2020 Antwerp,  
27 Belgium.

28

29 3. Organismal and Evolutionary Biology Research Programme, University of Helsinki,  
30 Viikinkaari 9, 00014, Helsinki, Finland.

31

32

33 **Corresponding Authors:**

34

35 Ehsan Pashay Ahi,

36 Email: ehsan.pashayahi@helsinki.fi

37

38 Christian Sturmbauer,

39 Email: christian.sturmbauer@uni-graz.at

40

41 **\* The first two authors contributed equally to this study**

42

43

44

45

46

47 **Abstract**

48 **Background:** Elasmoid scales are one of the most common dermal appendages and can be  
49 found in almost all species of bony fish differing greatly in their shape. Whilst the genetic  
50 underpinnings behind elasmoid scale development have been investigated, not much is  
51 known about the mechanisms involved in the shaping of scales. To investigate the links  
52 between gene expression differences and morphological divergence, we inferred shape  
53 variation of scales from two different areas of the body (anterior and posterior) stemming  
54 from ten haplochromine cichlid species from different origins (Lake Tanganyika, Lake  
55 Malawi, Lake Victoria and riverine). Additionally, we investigated transcriptional differences  
56 of a set of genes known to be involved in scale development and morphogenesis in fish.

57

58 **Results:** We found that scales from the anterior and posterior part of the body strongly differ  
59 in their overall shape, and a separate look on scales from each body part revealed similar  
60 trajectories of shape differences considering the lake origin of single investigated species.  
61 Above all, nine as well as 11 out of 16 target genes showed expression differences between  
62 the lakes for the anterior and posterior dataset, respectively. Whereas in posterior scales four  
63 genes (*dlx5*, *eda*, *rankl* and *shh*) revealed significant correlations between expression and  
64 morphological differentiation, in anterior scales only one gene (*eda*) showed such a  
65 correlation. Furthermore, *eda* displayed the most significant expression difference between  
66 species of Lake Tanganyika and species of the other two younger lakes. Finally, we found  
67 genetic differences in downstream regions of *eda* gene (e.g. in the *eda-mnfsf13b* inter-genic  
68 region) that are associated with observed expression differences. This is reminiscent of a  
69 genetic difference in the *eda-mnfsf13b* inter-genic region which leads to gain or loss of armour  
70 plates in stickleback.

71

72 **Conclusion:** These findings provide evidence for cross-species transcriptional differences of  
73 an important morphogenetic factor, *eda*, which is involved in formation of ectodermal  
74 appendages. These expression differences appeared to be associated with morphological  
75 differences observed in the scales of haplochromine cichlids indicating potential role of *eda*  
76 mediated signal in divergent scale morphogenesis in fish.

77

78

79

## 80 **Keywords**

81 Scale morphology; gene expression; adaptive radiation; East African lakes; Lake Tanganyika;  
82 Lake Malawi; Lake Victoria; African cichlids

83

## 84 **Background**

85 Cichlids pose a great a model system for evolutionary biology, as they include some of the  
86 most striking examples of explosive speciation and adaptive radiation. Many aspects of their  
87 life history as well as their behaviour, coloration and feeding morphologies are well studied  
88 [1–3]. One of the most striking features is their repeated evolution of parallel eco-  
89 morphologies, especially across the radiations of the three East African Great Lakes, Lake  
90 Tanganyika (LT), Lake Malawi (LM) and Lake Victoria (LV) [4, 5]. These ecological  
91 adaptations are also the focus of many studies, as they promise the opportunity to shed light  
92 on different molecular mechanisms underlying repeated evolution and diversification [6, 7].  
93 Regarding skeletal morphogenesis in particular the evolution of their jaws and their  
94 phenotypic plasticity are topics of ongoing research [7–12]. However, while the adaptive  
95 value of some of the investigated structures (e.g., feeding apparatus) can be more easily  
96 connected to certain ecological specializations [5, 13], this is not so obvious in others, such as  
97 scales.

98

99 Fish scales come in a vast array of different shapes and forms. As a part of the dermal  
100 skeleton, which amongst other structures also includes teeth, odontodes, spines and fin rays,  
101 these postcranial derivatives evolved into morphologically and histologically diverse structures  
102 in Actinopterygii [14, 15]. Elasmoid scales, found in most of teleost species, form in the  
103 dermal mesenchyme and are mainly used for protection and hypothetically for hydrodynamic  
104 modifications [14, 16, 17]. While the elasmoid scales form relatively late in ontogeny and can  
105 take diverse forms, they share a composition consisting of three tissues, with elasmodin as the  
106 basal component formed in a characteristic plywood-like structure [15, 16]. Scale  
107 development, mostly studied in zebrafish, has been found to be orchestrated by several well-  
108 known pathways, including Hh, Fgf and Eda [16, 18–20], which are known to be also  
109 involved in the appendage formation across several vertebrate groups [21]. Mutations and  
110 allele variations in the Eda/Edar pathway, for example, have been linked to fish fin, scale  
111 and armour plate development as well as human and mouse hair and teeth growth [19, 22,  
112 23]. Nevertheless, besides a recent extensive comparison of the scale morphology across

113 Lake Tanganyika cichlids [24], as well as a genetic study of scale shapes in two closely  
114 related Lake Malawi cichlids, which tied Fgf signalling to scale shape variation [20], not  
115 much is known about the molecular mechanisms shaping the elasmoid scale.

116

117 In this study, we investigate the morphological differences in the anterior and posterior scales  
118 of 10 haplochromine cichlid fish species from three Great East African Lakes, i.e., Lake  
119 Tanganyika (LT), Lake Malawi (LM) and Lake Victoria (LV) as well as a riverine  
120 haplochromine cichlid species. After identification of a stably expressed reference gene, we  
121 also investigate transcriptional differences of a set of genes known to be involved in scale  
122 development and morphogenesis in fish. Finally, we tried to find links between the gene  
123 expression differences and morphological divergence in both anterior and posterior scales.  
124 Our results provide cross-species expression comparisons of scale related genes in  
125 haplochromine cichlids and implicate expression differences by which formation of distinct  
126 scale morphologies might be determined.

127

## 128 **Methods**

### 129 **Fish husbandry and sampling**

130 Ten haplochromine cichlid species; three species from Lake Tanganyika, four species from  
131 Lake Malawi, two species from Lake Victoria, and one riverine haplochromine species, were  
132 selected for this study (Fig. 1A). The fish were kept and raised in standardized tanks and  
133 rearing conditions with the same diet (Spirulina flakes) until they displayed mating  
134 behaviour. Between 5 to 11 adult females per species were sampled for morphological  
135 analysis and 4 adult females were sampled for gene expression investigation. The sampled  
136 fish species were sacrificed by euthanization in with 0.5 g MS-222/litre of water, and 5  
137 anterior and posterior scales from left side of the body were removed for morphological  
138 analysis (Fig. 1B), whereas similar numbers of scales were taken from both sides and all  
139 anterior or posterior scales from each fish were pooled for gene expression part.

140

### 141 **Morphological analysis**

142 To infer shape differences of scales from divergent African cichlids from different lakes a 2D  
143 geometric morphometric framework was deployed. Due to major morphological differences  
144 of the scales they were separately investigated for the anterior and posterior part of the body  
145 (Fig. 1 B and C). Standardized images of scales were taken with a KEYENCE VHX-5000

146 digital microscope (KEYENCE Germany GmbH). 84 adult specimens from 10 cichlid  
147 species inhabiting the three major rift lakes which were reared under standardized aquarium  
148 conditions (*Astatotilapia burtoni* = 7; *Neochromis omnicaeruleus* = 10; *Petrochromis famula*  
149 = 11, *P. polyodon* = 7; *Paralabidochromis sawage* = 5; *Simochromis diagramma* = 11;  
150 *Sciaenochromis fryeri* = 5; *Tropheops tropheops* = 9; *Labeotropheus trewavasae* = 9; Mz:  
151 *Maylandia zebra* = 10) were included for the geometric morphometric analyses. For each  
152 individual six scale replicates from the anterior and posterior part of the body were probed  
153 (Fig. 1B), leading to a total of 1.008 investigated scales. After randomizing pictures in tpsUtil  
154 v.1.6 (available at <http://life.bio.sunysb.edu/morph/soft-utility.html>), landmark digitization  
155 was conducted on a set of 7 fixed landmarks and 14 semi-landmarks (see Figure 1b for  
156 positions) in tpsDig v.2.26 (available at <http://life.bio.sunysb.edu/morph/soft-utility.html>).  
157 To ensure consistency, this step was conducted by a single investigator. Generalized  
158 Procrustes superimposition [25] was performed in tpsRelw v.1.65 (available at  
159 <http://life.bio.sunysb.edu/morph/soft-utility.html>) and aligned landmark configurations were  
160 exported for further analysis in MorphoJ v.1.06 [26]. In MorphoJ, single observations  
161 obtained from the six replicates were averaged to get the mean shape for each landmark. A  
162 Principal Component analysis (PCA) was applied to infer variation in morphospace among  
163 scale position (anterior vs. posterior), single specimen, and species. Subsequent analyses  
164 were based on separated datasets for anterior and posterior scale landmark setting, whereas  
165 PC-scores were exported for linear discriminant function analyses (LDA) in PAST v.4.1 [27].  
166 To reduce the number of variables and control for putative over-separation of groups [28],  
167 only the first four principal components were used for the LDA. PCA and LDA plots were  
168 visualized in R v3.1.2 [29].

169

## 170 **RNA isolation and cDNA synthesis**

171 As mentioned in the section above, 10 anterior and posterior scales from each fish were  
172 pooled for isolating the total RNA isolation in a single tube containing 0.25 mL of a tissue  
173 lysis buffer from Reliaprep RNA tissue miniprep system (Promega, #Z6111, USA) as well as  
174 one 1.4 mm ceramic bead to crush the scales. The scales were homogenized using a FastPrep-  
175 24 Instrument (MP Biomedicals, Santa Ana, CA, USA) and total RNA was extracted  
176 following the instructions provided by the manufacturer (adjusted protocol for small amounts  
177 of fibrous tissue). In summary, the instruction follows with mixing of the lysis buffer and  
178 homogenized scales with isopropanol and centrifuging the entire mix through a column

179 provided by the kit, several RNA washing steps and a final DNase treatment step. The RNAs  
180 were quantified by a Nanophotometer (IMPLEN GmbH, Munich, Germany) and their quality  
181 was checked with RNA ScreenTapes on an Agilent 2200 TapeStation (Agilent  
182 Technologies). Next, the RNA samples with a RNA integrity number (RIN) above six were  
183 applied to first strand cDNA synthesis using 300ng of RNA and High Capacity cDNA  
184 Reverse Transcription kit (Applied Biosystems). The synthesized cDNA from each RNA  
185 sample was diluted 1:5 times in nuclease-free water to conduct qPCR.

186

### 187 **Gene selection, designing primers and binding site predictions**

188 We selected eight candidate reference genes which have been frequently used in different  
189 studies of Haplochromine cichlids and have shown high expression levels in various  
190 connective tissues including skeletal tissues [10, 30–35]. Furthermore, we chose 16 target  
191 candidate genes, which are implicated in scale development and morphogenesis (Table 1).  
192 The primers were designed at conserved sequence of coding regions using the transcriptome  
193 data of several East African haplochromine species (*Astatotilapia burtoni*, *Aulonocara*  
194 *baenschi*, *Cyrtocara moorii*, *Pundamilia nyererei*, *Metriaclima zebra*, *Simochromis*  
195 *diagramma*, *Tropheus duboisi*, and *Gnathochromis pfefferi*) as well as two more distant  
196 species from different African cichlid tribes (*Oreochromis niloticus* and *Neolamprologus*  
197 *brichardi*) [7, 36–39]. The sequences from all the species were imported to CLC Genomic  
198 Workbench, version 7.5 (CLC Bio, Aarhus, Denmark), and after alignment, the exon/exon  
199 junctions were specified using the *Astatotilapia burtoni* annotated genome in the Ensembl  
200 database (<http://www.ensembl.org>) [40]. The primers were designed spanning exon junctions  
201 and a short amplicon size (<250 bp) as recommended to be optimal for qPCR quantification  
202 [41]. The primers were designed and assessed through Primer Express 3.0 (Applied  
203 Biosystems, CA, USA) and OligoAnalyzer 3.1 (Integrated DNA Technology) to minimize  
204 the occurrence of dimerization and secondary structures.

205

206 We retrieved downstream sequences (3'UTR and inter-genic region) of *eda* gene for all the  
207 species in this study from European Nucleotide Archive (ENA) and Sequence Read Archive  
208 (SRA) in order to identify changes in potential binding sites. To do this, we used genomic  
209 sequences of the haplochromine species; *A. burtoni* (GCA\_000239415.1), *P. famula*  
210 (GCA\_015108095.1), *N. omnicaeruleus* (SRR12700904), *P. polyodon* (GCA\_015103895.1),  
211 *S. fryeri* (ERX1818621), *S. diagramma* (GCA\_900408965.1), *M. zebra*

212 (GCA\_000238955.1), *T. tropheops* (SAMEA2661272), *L. trewavasae* (SAMN12216683),  
213 and *P. sauvagei* (GCA\_018403495.1). Next we identify the 3'UTR and inter-genic region of  
214 *eda* genes using the annotated genome of *A. burtoni* from Ensembl and aligned them using  
215 CLC Genomic Workbench. The different sequence motifs were identified and screened for  
216 potential TF binding sites using STAMP [42] and the PWMs obtained from the TRANSFAC  
217 database [43].

218

### 219 **qPCR and data analysis**

220 The qPCR reactions were generated using Maxima SYBR Green/ROX qPCR Master Mix  
221 (2X) (Thermo Fisher Scientific, Germany) and the amplifications were conducted on ABI  
222 7500 real-time PCR System (Applied Biosystems). The qPCR setups followed the  
223 recommended optimal sample maximization method [44]. The qPCR program, dissociation  
224 step and calculation of primer efficiencies were performed as described in our previous study  
225 [45] (Additional file 1).

226

227 Three different algorithms were applied to validate the most stable reference genes;  
228 BestKeeper [46], NormFinder [47] and geNorm [48]. The C<sub>q</sub> value of the most stable  
229 reference gene was used as normalization factor (C<sub>q</sub> <sub>reference</sub>) to calculate ΔC<sub>q</sub> of each target  
230 gene (ΔC<sub>q</sub> <sub>target</sub> = C<sub>q</sub> <sub>target</sub> - C<sub>q</sub> <sub>reference</sub>). The lowest expressed sample in each expression  
231 comparison was used as a calibrator sample and rest of the samples were subtracted from its  
232 ΔC<sub>q</sub> value to calculate ΔΔC<sub>q</sub> values (ΔC<sub>q</sub> <sub>target</sub> - ΔC<sub>q</sub> <sub>calibrator</sub>). Relative expression quantities  
233 (RQ) were calculated through  $E^{-\Delta\Delta Cq}$  [49]. In order to perform statistical analysis, fold  
234 differences (FD) were calculated by transformation of RQ values to logarithmic values [50].  
235 The significant expression differences were calculated using ANOVA statistical tests,  
236 followed by Tukey's HSD *post hoc* tests. The correlations between gene expression and a  
237 morphometric parameter (canonical variate 1) were calculated through Pearson correlation  
238 coefficients (r) for each gene using R.

239

## 240 **Results**

### 241 **Divergence in scale morphology**

242 The principal component analysis (PCA) revealed a clear separation in overall average  
243 individual shape between anterior and posterior scales (Fig. 1D). PC1 and PC2 explained  
244 78.3 % and 8.6 % of the total shape variation, respectively. Generally, on the first axis



245 anterior scales are anterior-posteriorly more compressed compared to the posterior body part  
246 (see deformation grids in Fig. 1D). Along the second PC axis changes can be observed in the  
247 shape of the posterior scale field (narrow vs. wide), as well as in the lateral edges of the  
248 anterior scale field (edges vs. round).

249

250 While comparing different species, large variation in overall shape can be observed in the  
251 dataset which is restricted to anterior scales only. *Petrochromis famula*, *Maylandia zebra* and  
252 *Sciaenochromis fryeri* occupy large parts of the morphospace and overall, less intraspecific  
253 variation can be observed in other species (Fig. 2A). In the anterior dataset changes along the  
254 PC1 explain 47.1 % of total variation, and mainly affect the circularity of the overall shape  
255 (i.e., that scales get more compressed towards positive values). Changes along the second PC,  
256 which explains 19.6 % of the total shape variation, affect the posterior scale field  
257 (compression vs. expansion). Compared to anterior scales, less intraspecific shape variation  
258 can be observed in posterior scales, whereas PC1 explains 54.8 % and PC2 18.9 % of the  
259 total variation, respectively (Fig. 2B). PC1 separates two major clusters (*S. diagramma* + *P.*  
260 *famula* vs. rest) whereas changes along the axis mainly contribute to a dorso-ventrally versus  
261 anterior-posterior compression of the scale and the roundness of the anterior scale field.  
262 Along PC2 shape changes affect the expansion (or compression) of the anterior and posterior  
263 scale fields. Generally, the PCA only poorly resolves the lake (or phylogenetic) origin of the  
264 single species for both the anterior and posterior dataset.

265

266 The linear discriminant function analysis (LDA) of anterior as well as posterior dataset  
267 correctly classified 77.38 % (jackknifed: 67.86 %) and 72.62 % (jackknifed: 65.48%) of  
268 species (Fig. 2C and D). The first axis explains 83.66 % and 76.00 % variance of the overall  
269 shape variability for the anterior and posterior dataset, respectively. In the anterior dataset,  
270 the first LD-axis separates three major clusters made up of samples from Lake Tanganyika,  
271 the riverine *Astatotilapia burtoni* and a joint Victoria-Malawi cluster. Similar results were  
272 obtained for the posterior dataset, whereas along the first axis the separation between the  
273 riverine *A. burtoni* and the Victoria-Malawi cluster is less prominent. Along the second axis,  
274 which explains 10.04 % and 13.2 % of the variance of the overall shape variability for the  
275 anterior and posterior dataset, respectively, mainly interspecific and intraspecific variation is  
276 portrayed. Overall, for the anterior dataset, 83.33% (jackknifed: 75 %) of species were  
277 correctly classified according to the lake origin, whereas single classification scores reached  
278 values of 100 % (jackknifed: 85.71 %) for *A. burtoni*, as well as 66.67 % (jackknifed: 57.58



279 %) for Malawi, 86.67 % (jackknifed: 86.67 %) for Victoria and 96.55 % (jackknifed: 86.21  
280 %). In total, for the posterior dataset, 77.38 % (jackknifed: 70.24 %) of the individuals were  
281 correctly assigned to the lake origin, with 85.71 % (jackknifed: 71.43 %) for *A. burtoni*, as  
282 well as 66.67 % (jackknifed: 54.55 %) for Malawi, 53.33% (jackknifed: 46.67 %) for  
283 Victoria and 100 % (jackknifed: 100 %) for individuals from Tanganyika.

284

### 285 **Validation of stable reference genes**

286 To quantify the expression levels of the selected target genes, the validation of stable  
287 reference gene(s) with least variation in expression across the anterior and posterior scales of  
288 different species is a necessary step [51]. The 8 candidates were selected from frequently  
289 used reference genes in studies of different tissues in East African cichlids [10, 30–35]. The  
290 candidate reference genes showed variable expression levels in the scales, and from highest  
291 to lowest expressed were respectively; *actb1*, *hsp90a*, *rps11*, *rps18*, *hprt1*, *gapdh*, *elf1a* and  
292 *tbp*. Interestingly, in both anterior and posterior scales, all the three software ranked *actb1* as  
293 the most stable reference gene with lowest expression variation across the cichlid species in  
294 this study (Table 2). Thus, we used the Cq value of *actb1* as normalization factor (NF) in  
295 each sample for quantification of relative expression analyses of the target genes.

296

### 297 **Gene expression differences between anterior and posterior scales**

298 The relative expression levels of 16 candidate target genes, *bmp4*, *colla2*, *ctsk*, *dlx5*, *eda*,  
299 *edar*, *fgf20*, *fgfr1*, *mmp2*, *mmp9*, *opg*, *rankl*, *runx2a*, *sema4d*, *shh* and *sp7*, were compared  
300 between the anterior and posterior scales in each of the haplochromine species (Fig. 3). Some  
301 of these genes such as *bmp4*, *colla2*, *rankl* and *sp7*, showed almost no expression difference  
302 between the anterior and posterior scales. Moreover, none of the target genes showed  
303 consistent expression difference across all the species. These indicate potential involvement  
304 of various genes in morphological divergence between the anterior and posterior scales.  
305 However, two genes, *ctsk* and *shh* exhibited expression difference between the anterior and  
306 posterior scales in most of the species (Fig. 3). The directions of expression differences  
307 between the anterior and posterior scales for *ctsk* and *shh* were variable depending on the  
308 species. Interestingly all the three species from LT showed higher expression in the anterior  
309 scale for *shh*, whereas the all the species from LM and LV showed tendency for opposite  
310 pattern with increased posterior scale expression. These findings suggest potential role of *ctsk*  
311 and *shh* in morphological divergence of the scales along anterior-posterior axis.

312

### 313 **Gene expression differences between lakes in anterior and posterior scales**

314 Next, we compared the expression levels of the target genes between the lakes in the anterior  
315 or posterior scales by considering all the species from each lake as one group (Fig. 4). In the  
316 anterior scales, nine out of 16 target genes showed expression differences between the lakes  
317 including *bmp4*, *ctsk*, *eda*, *edar*, *mmp2*, *opg*, *rankl*, *shh* and *sp7*. Most of these differences  
318 were between LT and the other lakes, and 4 genes, *ctsk*, *mmp2*, *opg* and *rankl* showed higher  
319 expression in LT species, while 3 genes, *bmp4*, *eda* and *shh* showed lower expression LT  
320 species. Furthermore, 2 genes, *ctsk* and *eda* displayed the strongest expression differences  
321 between the lakes in opposite patterns suggesting their role in morphological divergence of  
322 the anterior scales across the lakes (Fig. 4). In the posterior scales, 11 out of 16 target genes  
323 showed expression differences between the lakes including *bmp4*, *colla2*, *ctsk*, *eda*, *edar*,  
324 *fgf20*, *fgfr1*, *mmp2*, *opg*, *rankl*, *shh* and *sp7*. Again, most of these differences in the posterior  
325 scales were between LT and the other lakes, and 5 genes, *colla2*, *ctsk*, *mmp2*, *opg* and *rankl*  
326 showed higher expression in LT species, while 3 genes, *eda*, *fgf20* and *shh* showed lower  
327 expression LT species. In addition, four genes, *fgf20*, *rankl*, *eda* and *shh* displayed the  
328 strongest expression differences between the lakes in opposite patterns (*eda* and *rankl* higher  
329 in LT, and *fgf20* and *shh* lower in LT) suggesting their role in morphological divergence of  
330 the posterior scales across the lakes (Fig. 4). In general, more genes with stronger expression  
331 differences between the lakes were observed the posterior scales. Several genes such as *ctsk*,  
332 *eda*, *edar*, *mmp2*, *opg*, *rankl* and *shh* appeared to have similar patterns of expression  
333 differences between the lakes in both anterior and posterior scales. Importantly, we found  
334 only one gene, *eda*, to have strong differences between the lakes in both anterior and  
335 posterior scales indicating its potentially crucial role in morphological divergence of the  
336 scales across the lakes.

337

### 338 **Correlation analyses between gene expression and morphological divergence in scales**

339 We analysed the correlation between expression of the genes and canonical variate 1 in the  
340 anterior or posterior scales across the species. Only one gene, *eda*, showed significant  
341 correlation in the anterior scales (Fig. 5), whereas, in the posterior scales 4 genes including  
342 *dlx5*, *eda*, *rankl* and *shh* displayed significant correlations between expression and  
343 morphological differences (Fig. 6). Among these genes *eda* exhibited the strongest  
344 correlation in the posterior scales. However, the correlation patterns differed between the  
345 genes in the posterior scales, i.e. *eda* and *shh* showed positive while *dlx5* and *rankl* had

346 negative correlations with the morphological changes based canonical variate 1. Therefore,  
347 again only one gene, *eda*, showed significant correlation between its expression and the  
348 morphological differences in both scales indicating its potential role in divergent scale  
349 morphogenesis in the cichlid species. The opposite correlation patterns in the posterior scales  
350 might also indicate inhibitory regulatory connections between the genes.

351

### 352 **Genetic differences in non-coding sequences of *eda* gene**

353 Finally, we were interested to investigate genetic differences in available regulatory  
354 sequences of *eda* gene including 5'UTR, 3'UTR and short but conserved inter-genic region  
355 between *eda* and *tnfsf13b* (immediate downstream gene) across the species. Interestingly, we  
356 found two genetic differences (mutations/deletions) in 3'UTR and one in *eda-tnfsf13b* inter-  
357 genic region to differ between LT species versus LM and LV species (Table 3). Next, we  
358 parsed the short sequence regions containing the mutations/deletions against transcription  
359 factor binding site (TFBS) databases. We found that the two changes in 3'UTR seem to lead  
360 to gaining TFBS for transcription factors Mef2 and Tcf1 in the LM and LV species, whereas  
361 the changes in the inter-genic region led to gaining TFBS for Lef1 transcription factor in the  
362 LT species (Table 3). Importantly, the riverine species A.b appeared to have intermediate  
363 genetic changes meaning that for the two changes in 3'UTR it showed a deletion similar to  
364 the LT species but a mutation similar to the LV and LM species. Also, for the inter-genic  
365 change, A.b showed an intermediate mutation between the LT and the other species from LM  
366 and LV, however, this mutation showed no gain of TFBS (similar to the LM and LV species).  
367 Taken together, these genetic changes showed similarity with differences in gene expression  
368 and scale morphology, where the LT species clustered different from LM and LV species and  
369 the riverine species (A.b.) showed intermediate differences. This suggests that the identified  
370 genetic changes might be the underlying factors for divergent *eda* expression as well as  
371 differences in the scale morphology.

372

### 373 **Discussion**

374 As river-adapted haplochromine cichlids repeatedly seeded adaptive radiations in several East  
375 African lakes, cichlid fishes recurrently adapted to corresponding trophic niches. Thereby, the  
376 adaptive value of traits is often mirrored by morphological shape parallelism and concomitant  
377 similar lifestyles which result from parallel evolution [4, 5]. Hence, fishes from the cichlid  
378 species flocks in various African lakes comprise an exciting model to conduct comparative

379 morphological and molecular studies. While most previous studies focused on bony elements  
380 that can easily be linked particular trophic niches and divergent natural selection as driver of  
381 diversification in cichlids (e.g., [52]), other skeletal structures such as scales might show less  
382 obvious adaptive trajectories.

383

384 Above all, between the three East African Great Lakes, the haplochromine cichlids are  
385 especially interesting, as they share common ancestry and comprise the Tropheini at LT and  
386 the entire the LV and LM haplochromine radiations [53, 54]. As the lakes have all very  
387 different geological histories, with Lake Tanganyika being the oldest [55], LM the  
388 intermediate [56] and LV the youngest of the three [57], they also depict three extensive  
389 radiations at different time points. Thus, depending on the evolutionary age of the different  
390 lakes, species (and their morphologies) had more or less time to diverge, despite sharing  
391 parallels. The more time passes, much more elaborated predator-prey and host-parasite  
392 relationships can evolve. This is manifested by unique ecological and behavioural features,  
393 particularly in the oldest of the three lakes, LT, which contains cocoo-catfish species  
394 showing brood parasitism [58], dwarfed gastropod shell breeders [59], putative cleaning  
395 behaviour [60], or highly elaborated scale eaters [61] (but also see *Genyochromis mento* from  
396 Lake Malawi). Particularly the latter case, scale eating, could have influenced the co-  
397 evolution of scale morphology in host species. Lake Tanganyika's scale eaters (i.e.,  
398 *Perissodus*; Perissodini) show different degrees of specialization, whereas only the shallow  
399 water species, *Perrisodus microlepis* and *P. straeleni*, feed almost exclusively on fish scales  
400 while other species are not that specialized [4, 61]. The most common prey species of *P.*  
401 *microlepis* are members of the Tropheini and Eretmodini [62]. *P. straeleni* seems to be less  
402 specialised to certain prey items, but Tropheini scales still make up a major part of the gut  
403 contents [63]. Based on our dataset (Tropheini only) it remains speculative to assume that  
404 scale-related gene expression and the concomitant morphology might reflect an adaptation to  
405 reduce the risk of scale predation. Future studies, including more early branching (non-  
406 modern) haplochromine cichlids (e.g., *Pseudocrenilabrus*, *Thoracochromis*,  
407 *Astatoreochromis*) or other Tropheini with different lifestyles (e.g., *Ctenochromis*) will be  
408 necessary to establish stronger links between scale morphology and this unique predation  
409 pressure.

410

411 Nonetheless, understanding which genetic mechanisms underlie the scale morphology might  
412 be the key to understand how such similar and/or divergent eco-morphologies evolved.

413 Perhaps the most striking finding of our study was the highly significant differential  
414 expression of *eda* between LT species versus the species from the younger lakes (LM and LV  
415 species) in both anterior and posterior scales (Fig. 4). Interestingly, the *eda* expression in the  
416 riverine species (Ab), which is believed to be an ancestral species to haplochromine cichlids  
417 of the three great African lakes, was at intermediate level between LT and the species from  
418 LM and LV in both anterior and posterior scales. Moreover, the expression patterns of *eda* in  
419 both scales were highly correlated with morphological divergence across the species in this  
420 study. Ectodysplasin A (*eda*) encodes a member of the tumor necrosis factor family and  
421 mediates a signal conserved across vertebrates which is essential for morphogenesis of  
422 ectodermal appendages, such as scale, hair and feathers [22]. The *eda* signal is mediated  
423 through its receptor (encoded by *edar*) and initiated upon binding of *eda* to *edar* on the  
424 surface of a target cell [22]. In human, mutations in components of *eda* signal can cause  
425 hypohidrotic ectodermal dysplasia (HED) which is characterized by reduction and abnormal  
426 teeth morphology, absence or reduction of sweating glands and hair [64]. Similarly, impaired  
427 *eda* signal in zebrafish and medaka can lead to reduction in the number of scales and teeth  
428 [18, 19]. In sculpin (*Cottus*) fishes, genetic changes in the receptor gene (*edar*) has been  
429 found to be associated with morphological variations in body prickles (calcified spicules  
430 embedded in the skin), which are homologous structures to fish scales [65]. A later study in a  
431 highly derived order of teleosts, Tetraodontiformes, which includes ocean sunfishes,  
432 triggerfishes and pufferfishes, also showed the importance of *eda* signaling pathway in  
433 developmental formation and morphological variations of dermal spines (an extreme scale  
434 derivative) [66]. In stickleback, a mutation within an inter-genic region between *eda* and  
435 *tnfrsf13b* genes leads to changes in transcriptional responsiveness of *eda* to its upstream Wnt  
436 signaling pathway and consequently impairment of armor plate formation [67].

437  
438 In this study, we also found genetic changes in 3'UTR and the inter-genic region between *eda*  
439 and *tnfrsf13b* genes that could explain the differences in *eda* expression across the  
440 Haplochromine cichlids (Table 3). The genetic changes resulted gain or loss of motifs which  
441 were predicted to be binding sites for transcription factors encoded by *mef2*, *tcf1* and *lef1*  
442 genes. These changes always discriminated the LT species from the species from LM and  
443 LV, whereas the riverine species had changes which could be considered an intermediate to  
444 both groups. Interestingly, all of the three predicted transcription factors (*mef2*, *tcf1* and *lef1*)  
445 are linked to Wnt signaling pathway. It is already known that *mef2* can enhance canonical  
446 Wnt signal [68] and it is involved in osteogenesis as well [69–71]. The binding site motif for

447 *mef2* appeared to be deleted in 3'UTR of the LT and riverine species. On the other hand, a  
448 binding site motif for *tcfl* was gained in 3'UTR of the LM, LV and riverine species. In mice,  
449 *tcfl* is demonstrated to be involve in paraxial mesoderm and limb formation and appeared to  
450 be act downstream of Wnt signal similar to *lef1* transcription factor [72]. Moreover,  
451 canonical Wnt signaling has been shown to regulate osteogenesis through *tcfl* responsive  
452 element on regulatory sequence of *runx2* in mammals [73]. The third motif predicted to be a  
453 binding site for *lef1* and only found within *eda - tnfrsf13b* inter-genic region of LT species.  
454 *Lef1* is again a well-known mediator of canonical Wnt signaling pathway which inhibits final  
455 stage of osteoblast differentiation [74] but it is essential for osteoblast proliferation and  
456 normal skeletal development [75, 76]. During development *lef1* function is shown to be  
457 essential for scale outgrowth in zebrafish [77], and *eda* expression is known to be regulated  
458 by Wnt signal through *lef1* transcriptional activity in mammals [78, 79]. In stickleback,  
459 mutation in an inter-genic region between *eda* and *tnfrsf13b* genes is suggested to affect a  
460 binding site for c-jun transcription factor which its interaction with *lef1* is required for *eda*  
461 transcriptional response to Wnt signal during armor plate formation [67]. Taken together,  
462 these observations, suggest mutations in enhancer sequences required for binding of Wnt  
463 signal components as potential underlying reason for the divergent expression of *eda* in both  
464 anterior and posterior scales of the cichlid species in this study.

465

466 In the posterior scale, in addition to *eda*, three more genes, *dlx5*, *rankl* and *shh*, displayed  
467 expression correlation with morphological divergence across the cichlid species (Fig. 6). The  
468 first gene, distal less homeobox 5 or *dlx5*, encodes transcription factor stimulating osteoblast  
469 differentiation and bone development, and it is also implicated in scale development and  
470 regeneration in fish [80–82]. Apart from its role in skeletogenesis, *dlx5* has been found to be  
471 involved in divergent development and morphogenesis of other tissues in cichlids such as  
472 teeth and nuchal hump [39, 83, 84]. In goldfish, *dlx5* expression appeared to be important at  
473 early stages of scale regeneration [80], and in both zebrafish and goldfish, *dlx5* transcription  
474 in scale can be affected by environmental clues such as mechanical stimulus [81, 82]. The  
475 second gene, *rankl*, encodes a ligand for osteoprotegerin (*opg*) and play crucial role in  
476 osteoclast differentiation and bone remodelling. Changes in *rankl* transcription appeared to be  
477 important during scale regeneration in goldfish [80, 85], as well as intercellular  
478 communications regulating scale bone remodeling in zebrafish and goldfish [81, 86]. Both  
479 *dlx5* and *rankl* have shown expression correlation patterns opposite to *eda* and *shh* in the  
480 posterior scales. Although, direct regulatory connections between these factors have not been



481 investigated in scale but these findings suggest their potential interactions at transcriptional  
482 level. Moreover, higher expression of *rankl* in the scales of LT species compared to LM and  
483 LV species might indicate higher level of bone remodelling in their scales.

484

485 The third gene, sonic hedgehog or *shh*, encodes a ligand of hedgehog signaling pathway  
486 which is shown to control scale morphogenesis in relationship with the formation of the  
487 epidermal fold in the posterior region of scale in fish [16]. In zebrafish, epidermal expression  
488 of *shh* has been shown to regulate scale regeneration through controlling osteoblast  
489 population and affecting directional bone growth [87]. We found similar expression pattern  
490 between *eda* and *shh* which is more pronounced in the posterior scales. This is consistent  
491 with previous findings in other vertebrates, for instance, *eda* has been demonstrated to act  
492 upstream of *shh* and induce *shh* expression during ectodermal organogenesis in mammals  
493 (e.g. during hair placode formation) [88–92]. Furthermore, it has been shown that the *eda*-  
494 dependent regulation of *shh* might be a part of larger molecular cascade in which an upstream  
495 signal such as Wnt pathway activates *eda* signal and in turn *eda* induces *shh* transcription [90,  
496 92, 93]. These observations suggest potential role of *Wnt-eda-shh* axis in divergent scale  
497 morphogenesis across Haplochromine cichlids, which seems to be more pronounced in the  
498 posterior scales.

499

## 500 **Conclusions**

501 This is the first attempt to study cross-species association between gene expression and  
502 morphological divergence in scales of cichlids from different lakes. Our results provide  
503 evidence for potential role of a key signal mediated by *eda* gene to be involved in divergent  
504 morphogenesis of scale in closely related cichlid species. We show that *eda* expression has  
505 lower level in the scales of species from the older lake (Lake Tanganyika) and correlates with  
506 the observed shape variations across species. Our findings shed light on molecular basis of  
507 morphological divergence of a less studied skeletal element; however, further investigations  
508 are required to understand whether these differences have adaptive relevance in ecological  
509 and evolutionary-developmental contexts.

510

## 511 **List of abbreviations**

512 **LT:** Lake Tanganyika, **LM:** Lake Malawi, **LV:** Lake Victoria, ***bmp4*:** bone morphogenetic  
513 protein 4, ***colla2*:** collagen type I alpha 2 chain, ***ctsk*:** cathepsin K, ***dlx5*:** distal-less homeobox  
514 5, ***eda*:** ectodysplasin A, ***edar*:** ectodysplasin A receptor, ***fgf20*:** fibroblast growth factor 20,

515 *fgfr1*: fibroblast growth factor receptor 1, *mmp2*: matrix metalloproteinase 2, *mmp9*: matrix  
516 metalloproteinase 9, *opg*: osteoprotegerin, *runkl*: receptor activator of nuclear factor kappa B  
517 ligand, *runx2a*: runt-related transcription factor 2 alpha, *sema4d*: semaphorin 4D, *shh*: sonic  
518 hedgehog signaling molecule, *sp7*: osterix transcription factor.

519

## 520 **Declarations**

### 521 *Authors' contributions*

522 EPA, SB, MW and CS designed the study. SB, EPA, MW, and AD conducted the laboratory  
523 experiment, measurements and figure preparations. MW and EPA analysed the data, and  
524 EPA, MW, AD and CS wrote the manuscript. WG and AD performed fish breeding and  
525 sampling. WG photographed the adult fishes used in Figure 1A. All authors reviewed the  
526 manuscript and approved its content.

527

### 528 *Acknowledgements*

529 The authors acknowledge Institute of Biology at University of Graz for providing fish  
530 breeding and laboratory facilities, and the Austrian Science Fund for the financial support.  
531 We also thank Stephan Koblmüller for sharing his precious knowledge on cichlid fishes of  
532 the African Lakes.

533

### 534 *Competing interests*

535 The authors declare that they have no competing interests.

536

### 537 *Availability of data and materials*

538 All data generated or analysed during this study are included in this published article.

539

### 540 *Consent for publication*

541 Not applicable.

542

### 543 *Ethics approval and consent to participate*

544 Fish keeping and euthanasia were conducted under permit BMWFW-66.007/0004-  
545 WF/V/3b/2016 issued by the Federal Ministry of Science, Research and Economy of Austria  
546 (BMWFW) in accordance with the ethical guidelines and regulations of the BMWFW. Fish

547 keeping and sampling was carried out in our certified aquarium facility according to the  
548 Austrian animal welfare law.

549

### 550 ***Funding***

551 This study was funded by the Austrian Science Fund (Grant P29838). The Austrian Science  
552 Fund requires clarification of all legal issues concerning animal keeping, animal experiments  
553 and sampling design prior to grant submission and evaluation, but does not interfere in  
554 writing and data interpretation, but funds open access of the resulting publications.

555

### 556 **References**

- 557 1. Fryer G, Iles TD. The Cichlid Fishes of the Great lakes of Africa: their Biology and  
558 Evolution. Edinburgh: Oliver and Boyd.; 1972.
- 559 2. Kocher TD. Adaptive evolution and explosive speciation: The cichlid fish model. *Nature*  
560 *Reviews Genetics*. 2004;5.
- 561 3. Salzburger W. Understanding explosive diversification through cichlid fish genomics.  
562 *Nature Reviews Genetics*. 2018;19.
- 563 4. Muschick M, Indermaur A, Salzburger W. Convergent evolution within an adaptive  
564 radiation of cichlid fishes. *Curr Biol*. 2012;22:2362–8.
- 565 5. Wanek AK, Sturmbauer C. Form, function and phylogeny: comparative morphometrics of  
566 Lake Tanganyika’s cichlid tribe Tropheini. *Zool Scr*. 2015;44:362–73.
- 567 6. Albertson RC, Kocher TD. Genetic and developmental basis of cichlid trophic diversity.  
568 *Heredity (Edinb)*. 2006;97:211–21. doi:10.1038/sj.hdy.6800864.
- 569 7. Singh P, Börger C, More H, Sturmbauer C. The role of alternative splicing and differential  
570 gene expression in cichlid adaptive radiation. *Genome Biol Evol*. 2017;9:2764–81.
- 571 8. Albertson RC, Streelman JT, Kocher TD, Yelick PC. Integration and evolution of the  
572 cichlid mandible: the molecular basis of alternate feeding strategies. *Proc Natl Acad Sci U S*  
573 *A*. 2005;102:16287–92. doi:10.1073/pnas.0506649102.
- 574 9. Muschick M, Barluenga M, Salzburger W, Meyer A. Adaptive phenotypic plasticity in the  
575 Midas cichlid fish pharyngeal jaw and its relevance in adaptive radiation. *BMC Evol Biol*.  
576 2011;11:116. doi:10.1186/1471-2148-11-116.
- 577 10. Ahi EP, Singh P, Duenser A, Gessl W, Sturmbauer C. Divergence in larval jaw gene  
578 expression reflects differential trophic adaptation in haplochromine cichlids prior to foraging.  
579 *BMC Evol Biol*. 2019;19:150. doi:10.1186/s12862-019-1483-3.

- 580 11. Singh P, Ahi EP, Sturmbauer C. Gene coexpression networks reveal molecular  
581 interactions underlying cichlid jaw modularity. *BMC Ecol Evol.* 2021;21:1–17.  
582 doi:10.1186/s12862-021-01787-9.
- 583 12. Parsons KJ, Concannon M, Navon D, Wang J, Ea I, Groveas K, et al. Foraging  
584 environment determines the genetic architecture and evolutionary potential of trophic  
585 morphology in cichlid fishes. *Mol Ecol.* 2016;25.
- 586 13. van Rijssel JC, Hoogwater ES, Kische-Machumu MA, Reenen E van, Spits K V., van der  
587 Stelt RC, et al. Fast adaptive responses in the oral jaw of Lake Victoria cichlids. *Evolution (N*  
588 *Y).* 2015;69:179–89. doi:10.1111/evo.12561.
- 589 14. Huysseune A, Sire JY. Evolution of patterns and processes in teeth and tooth-related  
590 tissues in non-mammalian vertebrates. *Eur J Oral Sci.* 1998;106 1 SUPPL.
- 591 15. Sire JY, Huysseune A. Formation of dermal skeletal and dental tissues in fish: A  
592 comparative and evolutionary approach. *Biological Reviews of the Cambridge Philosophical*  
593 *Society.* 2003;78.
- 594 16. Sire JY, Akimenko MA. Scale development in fish: A review, with description of sonic  
595 hedgehog (shh) expression in the zebrafish (*Danio rerio*). *International Journal of*  
596 *Developmental Biology.* 2004;48:233–47.
- 597 17. Wainwright DK, Lauder G V. *Mucus Matters: The Slippery and Complex Surfaces of*  
598 *Fish.* 2017.
- 599 18. Kondo S, Kuwahara Y, Kondo M, Naruse K, Mitani H, Wakamatsu Y, et al. The medaka  
600 rs-3 locus required for scale development encodes ectodysplasin-A receptor. *Curr Biol.*  
601 2001;11:1202–6.
- 602 19. Harris MP, Rohner N, Schwarz H, Perathoner S, Konstantinidis P, Nüsslein-Volhard C.  
603 Zebrafish *eda* and *edar* Mutants Reveal Conserved and Ancestral Roles of Ectodysplasin  
604 Signaling in Vertebrates. *PLoS Genet.* 2008;4:e1000206. doi:10.1371/journal.pgen.1000206.
- 605 20. Albertson RC, Kawasaki KC, Tetrault ER, Powder KE. Genetic analyses in Lake Malawi  
606 cichlids identify new roles for Fgf signaling in scale shape variation. *Commun Biol.*  
607 2018;1:1–11.
- 608 21. Biggs LC, Mikkola ML. Early inductive events in ectodermal appendage morphogenesis.  
609 *Seminars in Cell and Developmental Biology.* 2014;25–26.
- 610 22. Mikkola ML, Thesleff I. Ectodysplasin signaling in development. *Cytokine and Growth*  
611 *Factor Reviews.* 2003;14:211–24.
- 612 23. Colosimo PF, Hosemann KE, Balabhadra S, Villarreal G, Dickson H, Grimwood J, et al.  
613 Widespread parallel evolution in sticklebacks by repeated fixation of ectodysplasin alleles.

- 614 Science (80- ). 2005;307.
- 615 24. Viertler A, Salzburger W, Ronco F. Comparative scale morphology in the adaptive  
616 radiation of cichlid fishes (Perciformes: Cichlidae) from Lake Tanganyika. *Biol J Linn Soc.*  
617 2021. doi:10.1093/biolinnean/blab099.
- 618 25. Rohlf FJ, Slice D. Extensions of the Procrustes Method for the Optimal Superimposition  
619 of Landmarks. *Syst Zool.* 1990;39:40. doi:10.2307/2992207.
- 620 26. Klingenberg CP. MorphoJ: an integrated software package for geometric morphometrics.  
621 *Mol Ecol Resour.* 2011;11:353–7. doi:10.1111/j.1755-0998.2010.02924.x.
- 622 27. Hammer Ø, Harper DAT, Ryan PD. Past: Paleontological statistics software package for  
623 education and data analysis. *Palaeontol Electron.* 2001;4.
- 624 28. Mitteroecker P, Gunz P. Advances in Geometric morphometrics. *Evol Biol.* 2009;36:235–  
625 47.
- 626 29. R Core Team. R: A Language and Environment for Statistical Computing. 2017.
- 627 30. Yang CG, Wang XL, Tian J, Liu W, Wu F, Jiang M, et al. Evaluation of reference genes  
628 for quantitative real-time RT-PCR analysis of gene expression in Nile tilapia (*Oreochromis*  
629 *niloticus*). *Gene.* 2013;527:183–92.
- 630 31. Gunter HM, Fan S, Xiong F, Franchini P, Fruciano C, Meyer A. Shaping development  
631 through mechanical strain: the transcriptional basis of diet-induced phenotypic plasticity in a  
632 cichlid fish. *Mol Ecol.* 2013;22:4516–31.
- 633 32. Ahi EP, Richter F, Sefc KM. A gene expression study of ornamental fin shape in  
634 *Neolamprologus brichardi*, an African cichlid species. *Sci Rep.* 2017.
- 635 33. Ahi EP, Duenser A, Singh P, Gessl W, Sturmbauer C. Appetite regulating genes may  
636 contribute to herbivory versus carnivory trophic divergence in haplochromine cichlids. *PeerJ.*  
637 2020;8:e8375. doi:10.7717/peerj.8375.
- 638 34. Ahi EP, Richter F, Lecaudey LA, Sefc KM. Gene expression profiling suggests  
639 differences in molecular mechanisms of fin elongation between cichlid species. *Sci Rep.*  
640 2019;9.
- 641 35. Lecaudey LA, Sturmbauer C, Singh P, Ahi EP. Molecular mechanisms underlying nuchal  
642 hump formation in dolphin cichlid, *Cyrtocara moorii*. *Sci Rep.* 2019;9:20296.  
643 doi:10.1038/s41598-019-56771-7.
- 644 36. Brawand D, Wagner CE, Li YI, Malinsky M, Keller I, Fan S, et al. The genomic substrate  
645 for adaptive radiation in African cichlid fish. *Nature.* 2014;513:375–81.
- 646 37. Ahi EP, Lecaudey LA, Ziegelbecker A, Steiner O, Goessler W, Sefc KM. Expression  
647 levels of the tetratricopeptide repeat protein gene *ttc39b* covary with carotenoid-based skin

- 648 colour in cichlid fish . Biol Lett. 2020.
- 649 38. Ahi EP, Lecaudey LA, Ziegelbecker A, Steiner O, Glabonjat R, Goessler W, et al.  
650 Comparative transcriptomics reveals candidate carotenoid color genes in an East African  
651 cichlid fish. BMC Genomics. 2020.
- 652 39. Lecaudey LA, Sturmbauer C, Singh P, Ahi EP. Molecular mechanisms underlying nuchal  
653 hump formation in dolphin cichlid, *Cyrtocara moorii*. Sci Rep. 2019.
- 654 40. Zerbino DR, Achuthan P, Akanni W, Amode MR, Barrell D, Bhai J, et al. Ensembl 2018.  
655 Nucleic Acids Res. 2018;46:D754–61.
- 656 41. Fleige S, Pfaffl MW. RNA integrity and the effect on the real-time qRT-PCR  
657 performance. Mol Aspects Med. 2006;27:126–39.
- 658 42. Mahony S, Benos P V. STAMP: a web tool for exploring DNA-binding motif  
659 similarities. Nucleic Acids Res. 2007;35 Web Server issue:W253-8.  
660 doi:10.1093/nar/gkm272.
- 661 43. Matys V, Fricke E, Geffers R, Gößling E, Haubrock M, Hehl R, et al. TRANSFAC®:  
662 Transcriptional regulation, from patterns to profiles. Nucleic Acids Research. 2003;31:374–8.
- 663 44. Hellemans J, Mortier G, De Paepe A, Speleman F, Vandesompele J. qBase relative  
664 quantification framework and software for management and automated analysis of real-time  
665 quantitative PCR data. Genome Biol. 2007;8:R19. doi:10.1186/gb-2007-8-2-r19.
- 666 45. Pashay Ahi E, Sefc KM. Towards a gene regulatory network shaping the fins of the  
667 Princess cichlid. Sci Rep. 2018;8:9602. doi:10.1038/s41598-018-27977-y.
- 668 46. Pfaffl MW, Tichopad A, Prgomet C, Neuvians TP. Determination of stable housekeeping  
669 genes, differentially regulated target genes and sample integrity: BestKeeper--Excel-based  
670 tool using pair-wise correlations. Biotechnol Lett. 2004;26:509–15.  
671 <http://www.ncbi.nlm.nih.gov/pubmed/15127793>. Accessed 12 Jun 2015.
- 672 47. Andersen CL, Jensen JL, Ørntoft TF. Normalization of real-time quantitative reverse  
673 transcription-PCR data: a model-based variance estimation approach to identify genes suited  
674 for normalization, applied to bladder and colon cancer data sets. Cancer Res. 2004;64:5245–  
675 50. doi:10.1158/0008-5472.CAN-04-0496.
- 676 48. Vandesompele J, De Preter K, Pattyn F, Poppe B, Van Roy N, De Paepe A, et al.  
677 Accurate normalization of real-time quantitative RT-PCR data by geometric averaging of  
678 multiple internal control genes. Genome Biol. 2002;3:RESEARCH0034.  
679 <http://www.pubmedcentral.nih.gov/articlerender.fcgi?artid=126239&tool=pmcentrez&render>  
680 type=abstract. Accessed 27 Jul 2014.
- 681 49. Pfaffl MW. A new mathematical model for relative quantification in real-time RT-PCR.



- 682 Nucleic Acids Res. 2001;29:e45.  
683 [http://www.pubmedcentral.nih.gov/articlerender.fcgi?artid=55695&tool=pmcentrez&rendert](http://www.pubmedcentral.nih.gov/articlerender.fcgi?artid=55695&tool=pmcentrez&rendertype=abstract)  
684 [ype=abstract](http://www.pubmedcentral.nih.gov/articlerender.fcgi?artid=55695&tool=pmcentrez&rendertype=abstract). Accessed 31 Jul 2014.
- 685 50. Bergkvist A, Rusnakova V, Sindelka R, Garda JMA, Sjögren B, Lindh D, et al. Gene  
686 expression profiling--Clusters of possibilities. *Methods*. 2010;50:323–35.  
687 doi:10.1016/j.ymeth.2010.01.009.
- 688 51. Kubista M, Andrade JM, Bengtsson M, Forootan A, Jonák J, Lind K, et al. The real-time  
689 polymerase chain reaction. *Mol Aspects Med*. 2006;27:95–125.  
690 doi:10.1016/j.mam.2005.12.007.
- 691 52. Ronco F, Matschiner M, Böhne A, Boila A, Büscher HH, El Taher A, et al. Drivers and  
692 dynamics of a massive adaptive radiation in cichlid fishes. *Nature*. 2021;589:76–81.
- 693 53. Salzburger W, Meyer A, Baric S, Verheyen E, Sturmbauer C. Phylogeny of the Lake  
694 Tanganyika cichlid species flock and its relationship to the Central and East African  
695 haplochromine cichlid fish faunas. *Syst Biol*. 2002;51.
- 696 54. Koblmüller S, Schlieven UK, Duftner N, Sefc KM, Katongo C, Sturmbauer C. Age and  
697 spread of the haplochromine cichlid fishes in Africa. *Mol Phylogenet Evol*. 2008;49:153–69.  
698 doi:10.1016/J.YMPEV.2008.05.045.
- 699 55. Cohen AS, Soreghan MJ, Scholz CA. Estimating the age of formation of lakes: an  
700 example from Lake Tanganyika, East African Rift system. *Geology*. 1993;21:511–4.
- 701 56. Delvaux D. Age of Lake Malawi (Nyasa) and water level fluctuations. *Mus roy Afr*  
702 *centr, Tervuren (Belg), Dept Geol Min, Rapp ann 1993 1994*. 1995;108.
- 703 57. Johnson TC, Kelts K, Odada E. The Holocene history of Lake Victoria. *Ambio*. 2000;29.
- 704 58. Blažek R, Polačik M, Smith C, Honza M, Meyer A, Reichard M. Success of cuckoo  
705 catfish brood parasitism reflects coevolutionary history and individual experience of their  
706 cichlid hosts. *Sci Adv*. 2018;4.
- 707 59. Koblmüller S, Duftner N, Sefc KM, Aibara M, Stipacek M, Blanc M, et al. Reticulate  
708 phylogeny of gastropod-shell-breeding cichlids from Lake Tanganyika - The result of  
709 repeated introgressive hybridization. *BMC Evol Biol*. 2007;7.
- 710 60. Takamura K. Interspecific relationships of aufwuchs-eating fishes in Lake Tanganyika.  
711 *Environ Biol Fishes*. 1984;10:225–41.
- 712 61. Takahashi R, Watanabe K, Nishida M, Hori M. Evolution of feeding specialization in  
713 Tanganyikan scale-eating cichlids: A molecular phylogenetic approach. *BMC Evol Biol*.  
714 2007;7.
- 715 62. Kovac R, Boileau N, Muschick M, Salzburger W. The diverse prey spectrum of the

- 716 Tanganyikan scale-eater *Perissodus microlepis* (Boulenger, 1898). *Hydrobiologia*. 2019;832.  
717 63. Boileau N, Cortesi F, Egger B, Muschick M, Indermaur A, Theis A, et al. A complex  
718 mode of aggressive mimicry in a scale-eating cichlid fish. *Biol Lett*. 2015;11.  
719 64. Mikkola ML. Molecular aspects of hypohidrotic ectodermal dysplasia. *Am J Med Genet*  
720 Part A. 2009;149A:2031–6. doi:10.1002/ajmg.a.32855.  
721 65. Cheng J, Sedlazeck F, Altmüller J, Nolte AW. Ectodysplasin signalling genes and  
722 phenotypic evolution in sculpins ( *Cottus* ). *Proc R Soc B Biol Sci*. 2015;282:20150746.  
723 doi:10.1098/rspb.2015.0746.  
724 66. Shono T, Thiery AP, Cooper RL, Kurokawa D, Britz R, Okabe M, et al. Evolution and  
725 Developmental Diversity of Skin Spines in Pufferfishes. *iScience*. 2019;19:1248–59.  
726 67. O’brown NM, Summers BR, Jones FC, Brady SD, Kingsley DM. A recurrent regulatory  
727 change underlying altered expression and Wnt response of the stickleback armor plates gene  
728 *EDA*. *Elife*. 2015;2015.  
729 68. Ehyai S, Dionyssiou MG, Gordon JW, Williams D, Siu KWM, McDermott JC. A p38  
730 MAPK regulated MEF2:β-catenin interaction enhances canonical Wnt signalling. *Mol Cell*  
731 *Biol*. 2015;36:MCB.00832-15.  
732 69. Shen S, Huang D, Feng G, Zhu L, Zhang Y, Cao P, et al. MEF2 Transcription Factor  
733 Regulates Osteogenic Differentiation of Dental Pulp Stem Cells. *Cell Reprogram*.  
734 2016;18:237–45. doi:10.1089/cell.2016.0016.  
735 70. Kawane T, Komori H, Liu W, Moriishi T, Miyazaki T, Mori M, et al. *Dlx5* and *Mef2*  
736 Regulate a Novel *Runx2* Enhancer for Osteoblast-Specific Expression. *J Bone Miner Res*.  
737 2014;29:1960–9. doi:10.1002/jbmr.2240.  
738 71. Potthoff MJ, Olson EN. MEF2: A central regulator of diverse developmental programs.  
739 *Development*. 2007;134:4131–40.  
740 72. Galceran J, Fariñas I, Depew MJ, Clevers H, Grosschedl R. *Wnt3a(-/-)* -like phenotype  
741 and limb deficiency in *Lef1(-/-)Tcf1(-/-)* mice. *Genes Dev*. 1999;13:709–17.  
742 73. Gaur T, Lengner CJ, Hovhannisyan H, Bhat RA, Bodine PVN, Komm BS, et al.  
743 Canonical WNT signaling promotes osteogenesis by directly stimulating *Runx2* gene  
744 expression. *J Biol Chem*. 2005;280:33132–40. doi:10.1074/jbc.M500608200.  
745 74. Kahler RA, Galindo M, Lian J, Stein GS, van Wijnen AJ, Westendorf JJ. Lymphocyte  
746 enhancer-binding factor 1 (*Lef1*) inhibits terminal differentiation of osteoblasts. *J Cell*  
747 *Biochem*. 2006;97:969–83. doi:10.1002/jcb.20702.  
748 75. Kahler RA, Westendorf JJ. Lymphoid enhancer factor-1 and β-catenin inhibit *Runx2*-  
749 dependent transcriptional activation of the osteocalcin promoter. *J Biol Chem*.

- 750 2003;278:11937–44.
- 751 76. Hoepfner LH, Secreto F, Jensen ED, Li X, Kahler RA, Westendorf JJ. Runx2 and bone  
752 morphogenic protein 2 regulate the expression of an alternative Lef1 transcript during  
753 osteoblast maturation. *J Cell Physiol.* 2009;221:480–9. doi:10.1002/jcp.21879.
- 754 77. Aman AJ, Fulbright AN, Parichy DM. Wnt/ $\beta$ -catenin regulates an ancient signaling  
755 network during zebrafish scale development. *Elife.* 2018;7.
- 756 78. Durmowicz MC, Cui CY, Schlessinger D. The EDA gene is a target of, but does not  
757 regulate Wnt signaling. *Gene.* 2002;285:203–11.
- 758 79. Lévy J, Capri Y, Rachid M, Dupont C, Vermeesch JR, Devriendt K, et al. *LEF1*  
759 haploinsufficiency causes ectodermal dysplasia. *Clin Genet.* 2020;97:595–600.  
760 doi:10.1111/cge.13714.
- 761 80. Thamamongood TA, Furuya R, Fukuba S, Nakamura M, Suzuki N, Hattori A. Expression  
762 of osteoblastic and osteoclastic genes during spontaneous regeneration and  
763 autotransplantation of goldfish scale: A new tool to study intramembranous bone  
764 regeneration. *Bone.* 2012;50:1240–9.
- 765 81. Kitamura K ichiro, Takahira K, Inari M, Satoh Y, Hayakawa K, Tabuchi Y, et al.  
766 Zebrafish scales respond differently to in vitro dynamic and static acceleration: Analysis of  
767 interaction between osteoblasts and osteoclasts. *Comp Biochem Physiol - A Mol Integr*  
768 *Physiol.* 2013;166:74–80.
- 769 82. Suzuki N, Hanmoto T, Yano S, Furusawa Y, Ikegame M, Tabuchi Y, et al. Low-intensity  
770 pulsed ultrasound induces apoptosis in osteoclasts: Fish scales are a suitable model for the  
771 analysis of bone metabolism by ultrasound. *Comp Biochem Physiol -Part A Mol Integr*  
772 *Physiol.* 2016;195:26–31.
- 773 83. Renz AJ, Gunter HM, Fischer JMF, Qiu H, Meyer A, Kuraku S. Ancestral and derived  
774 attributes of the *dlx* gene repertoire, cluster structure and expression patterns in an African  
775 cichlid fish. *Evodevo.* 2011;2:1. doi:10.1186/2041-9139-2-1.
- 776 84. Hulsey CD, Fraser GJ, Meyer A. Biting into the genome to phenome map:  
777 Developmental genetic modularity of cichlid fish dentitions. In: *Integrative and Comparative*  
778 *Biology.* Oxford University Press; 2016. p. 373–88.
- 779 85. Yamamoto T, Ikegame M, Kawago U, Tabuchi Y, Hirayama J, Sekiguchi T, et al.  
780 Detection of RANKL-producing cells and osteoclastic activation by the addition of  
781 exogenous RANKL in the regenerating scales of goldfish. *Biol Sci Sp.* 2020;34:34–40.
- 782 86. Tazaki Y, Sugitani K, Ogai K, Kobayashi I, Kawasaki H, Aoyama T, et al. RANKL,  
783 Ephrin-Eph and Wnt10b are key intercellular communication molecules regulating bone

- 784 remodeling in autologous transplanted goldfish scales. *Comp Biochem Physiol -Part A Mol*  
785 *Integr Physiol.* 2018;225:46–58.
- 786 87. Iwasaki M, Kuroda J, Kawakami K, Wada H. Epidermal regulation of bone  
787 morphogenesis through the development and regeneration of osteoblasts in the zebrafish  
788 scale. *Dev Biol.* 2018;437:105–19.
- 789 88. Schmidt-Ullrich R, Tobin DJ, Lenhard D, Schneider P, Paus R, Scheidereit C. NF- $\kappa$ B  
790 transmits Eda A1/EdaR signalling to activate Shh and cyclin D1 expression, and controls  
791 post-initiation hair placode down growth. *Development.* 2006;133:1045–57.
- 792 89. Fliniaux I, Mikkola ML, Lefebvre S, Thesleff I. Identification of *dkk4* as a target of Eda-  
793 A1/Edar pathway reveals an unexpected role of ectodysplasin as inhibitor of Wnt signalling  
794 in ectodermal placodes. *Dev Biol.* 2008;320:60–71.
- 795 90. Cui CY, Yin M, Sima J, Childress V, Michel M, Piao Y, et al. Involvement of Wnt, Eda  
796 and Shh at defined stages of sweat gland development. *Dev.* 2014;141:3752–60.
- 797 91. Pummila M, Fliniaux I, Jaatinen R, James MJ, Laurikkala J, Schneider P, et al.  
798 Ectodysplasin has a dual role in ectodermal organogenesis: Inhibition of Bmp activity and  
799 induction of Shh expression. *Development.* 2007;134:117–25.
- 800 92. Xiao Y, Thoresen DT, Miao L, Williams JS, Wang C, Atit RP, et al. A Cascade of Wnt,  
801 Eda, and Shh Signaling Is Essential for Touch Dome Merkel Cell Development. *PLOS*  
802 *Genet.* 2016;12:e1006150. doi:10.1371/journal.pgen.1006150.
- 803 93. Hammerschmidt B, Schlake T. Localization of Shh expression by Wnt and Eda affects  
804 axial polarity and shape of hairs. *Dev Biol.* 2007;305:246–61.
- 805 94. Hong YJ, Choi YW, Myung KB, Choi HY. The immunohistochemical patterns of  
806 calcification-related molecules in the epidermis and dermis of the zebrafish (*Danio rerio*).  
807 *Ann Dermatol.* 2011;23:299–303.
- 808 95. Le Guellec D, Morvan-Dubois G, Sire JY. Skin development in bony fish with particular  
809 emphasis on collagen deposition in the dermis of the zebrafish (*Danio rerio*). *International*  
810 *Journal of Developmental Biology.* 2004;48:217–31.
- 811 96. Metz JR, Leeuwis RHJ, Zethof J, Flik G. Zebrafish (*Danio rerio*) in calcium-poor water  
812 mobilise calcium and phosphorus from scales. *J Appl Ichthyol.* 2014;30:671–7.
- 813 97. de Vrieze E, Metz JR, Von den Hoff JW, Flik G. ALP, TRAcP and cathepsin K in  
814 elasmoid scales: a role in mineral metabolism? *J Appl Ichthyol.* 2010;26:210–3.
- 815 98. Iida Y, Hibiya K, Inohaya K, Kudo A. Eda/Edar signaling guides fin ray formation with  
816 preceding osteoblast differentiation, as revealed by analyses of the medaka all-fin less mutant  
817 *afl*. *Dev Dyn.* 2014;243:765–77. doi:10.1002/dvdy.24120.

- 818 99. Atukorala ADS, Inohaya K, Baba O, Tabata MJ, Ratnayake RAR., Abduweli D, et al.  
819 Scale and tooth phenotypes in medaka with a mutated ectodysplasin-A receptor: implications  
820 for the evolutionary origin of oral and pharyngeal teeth. *Arch Histol Cytol.* 2011;73:139–48.  
821 doi:10.1679/aohc.73.139.
- 822 100. Daane JM, Rohner N, Konstantinidis P, Djuranovic S, Harris MP. Parallelism and  
823 Epistasis in Skeletal Evolution Identified through Use of Phylogenomic Mapping Strategies.  
824 *Mol Biol Evol.* 2016;33:162–73. doi:10.1093/molbev/msv208.
- 825 101. Cooper WJ, Wirgau RM, Sweet EM, Albertson RC. Deficiency of zebrafish *fgf20a*  
826 results in aberrant skull remodeling that mimics both human cranial disease and  
827 evolutionarily important fish skull morphologies. *Evol Dev.* 2013;15:426–41.  
828 doi:10.1111/ede.12052.
- 829 102. Rohner N, Bercsényi M, Orbán L, Kolanczyk ME, Linke D, Brand M, et al. Duplication  
830 of *fgfr1* Permits Fgf Signaling to Serve as a Target for Selection during Domestication. *Curr*  
831 *Biol.* 2009;19:1642–7.
- 832 103. de Vrieze E, Sharif F, Metz JR, Flik G, Richardson MK. Matrix metalloproteinases in  
833 osteoclasts of ontogenetic and regenerating zebrafish scales. *Bone.* 2011;48:704–12.
- 834 104. Iimura K, Tohse H, Ura K, Takagi Y. Expression Patterns of *runx2*, *sparc*, and *bgp*  
835 During Scale Regeneration in the Goldfish *Carassius auratus*. *J Exp Zool Part B Mol Dev*  
836 *Evol.* 2012;318:190–8.
- 837 105. Zhong Z, Niu P, Wang M, Huang G, Xu S, Sun Y, et al. Targeted disruption of *sp7* and  
838 *myostatin* with CRISPR-Cas9 results in severe bone defects and more muscular cells in  
839 common carp. *Sci Rep.* 2016;6:1–14.
- 840
- 841



842

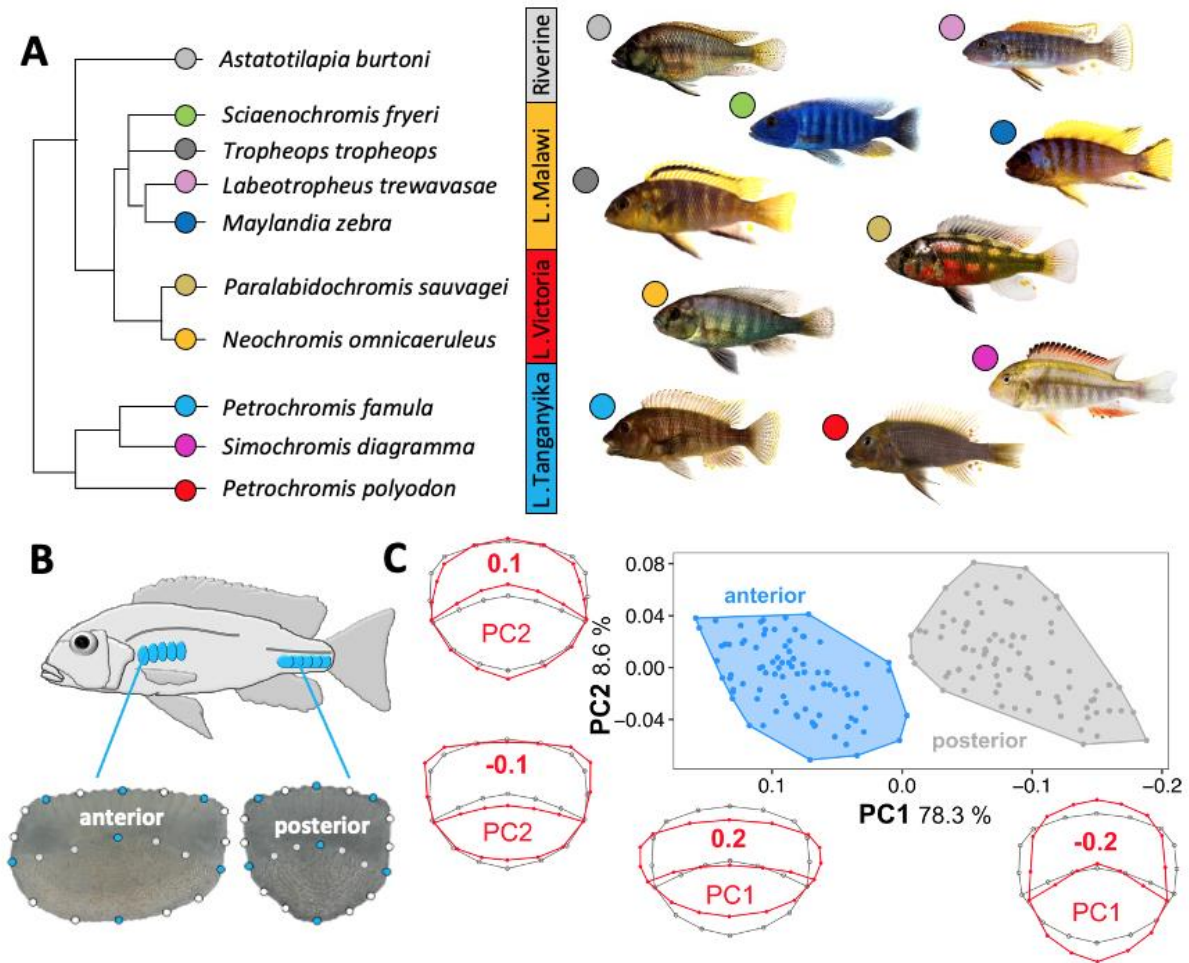

843

844 **Figure 1. The haplochromine cichlid species and descriptions of the scale samples.**

845 (a) A simplified phylogenetic relatedness of the East African haplochromine cichlid species  
 846 used in this study. (b) Positions of the anterior and posterior scales used in this study and  
 847 landmarks used for the geometric morphometric analyses in both anterior (left) and posterior  
 848 (right) scales shown as an example for *Petrochromis famula*. Blue dots represent major  
 849 landmarks, white dots semi-landmarks and 1 mm scale bars are given below the images. (c)  
 850 Principal component analysis (PCA) plots clearly separate scales from the anterior and  
 851 posterior part of the body. Additional, warped outline drawings illustrate major shape  
 852 changes along the axis (red) compared to the overall mean shape (grey).

853



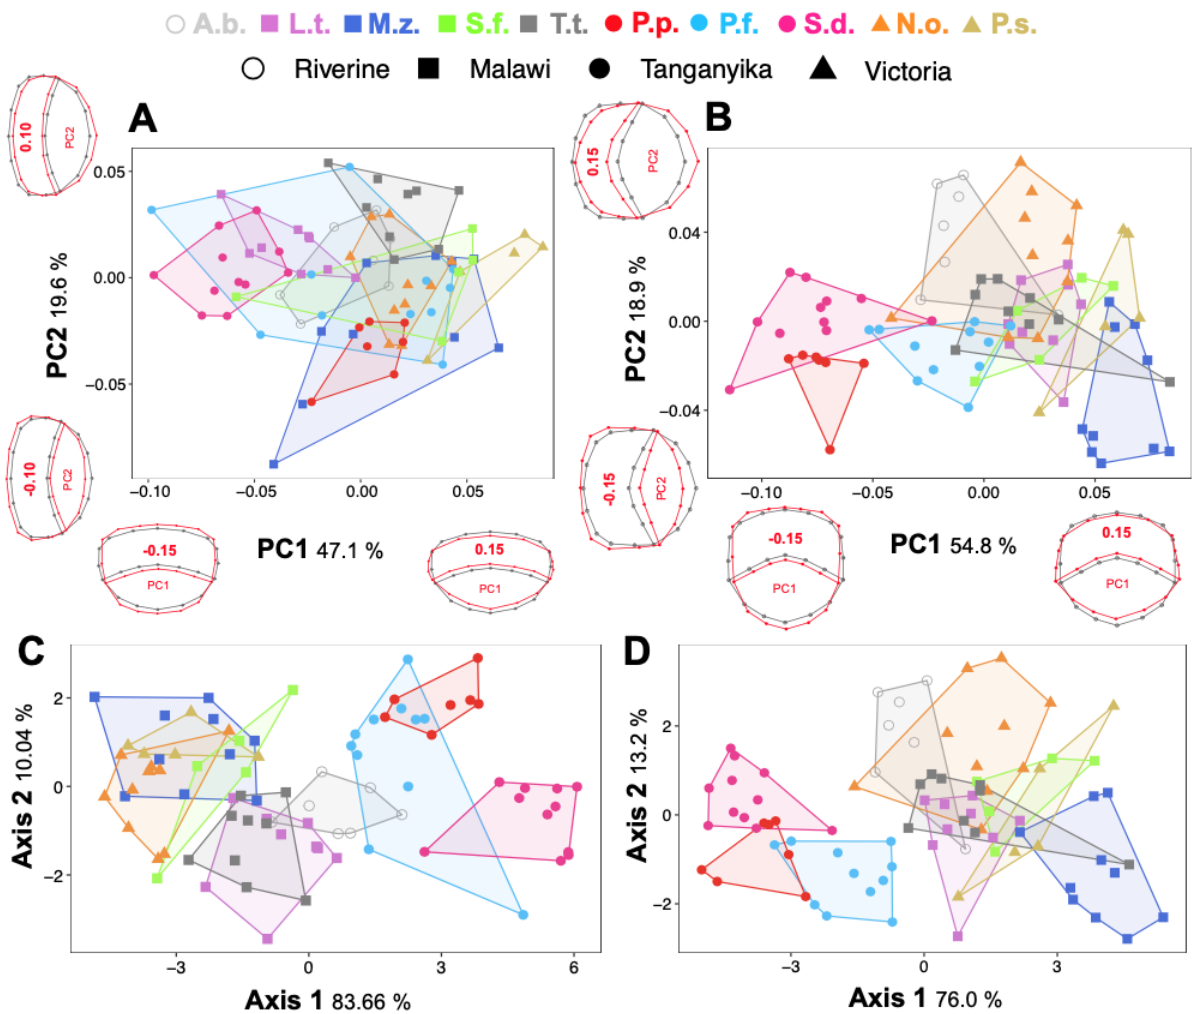

854

855 **Figure 2. Morphospace of investigated scales from different species and body parts.**

856 Principal component analysis based on average shape of scales collected for the anterior (a)

857 and posterior (b) part of the body and respective shape differences along the axis (grey:

858 overall mean shape; red: shape change). Linear discriminant function analysis based on the

859 first four PC-scores for anterior (c) and posterior (d) scales. All data points represent mean

860 shapes obtained from 6 individually collected scales and shapes represent different lake

861 origins. Abbreviations: A.b. *Astatotilapia burtoni*; N.o.: *Neochromis omnicaeruleus*; P.f.:  
 862 *Petrochromis famula*, P.p.: *P. polyodon*; P.s.: *Paralabidochromis sauvage* S.d.: *Simochromis*  
 863 *diagramma*; S.f.: *Sciaenochromis fryeri*; T.t.: *Tropheops tropheops*; L.t.: *Labeotropheus*  
 864 *trewavasae*; M.z.: *Maylandia zebra*.

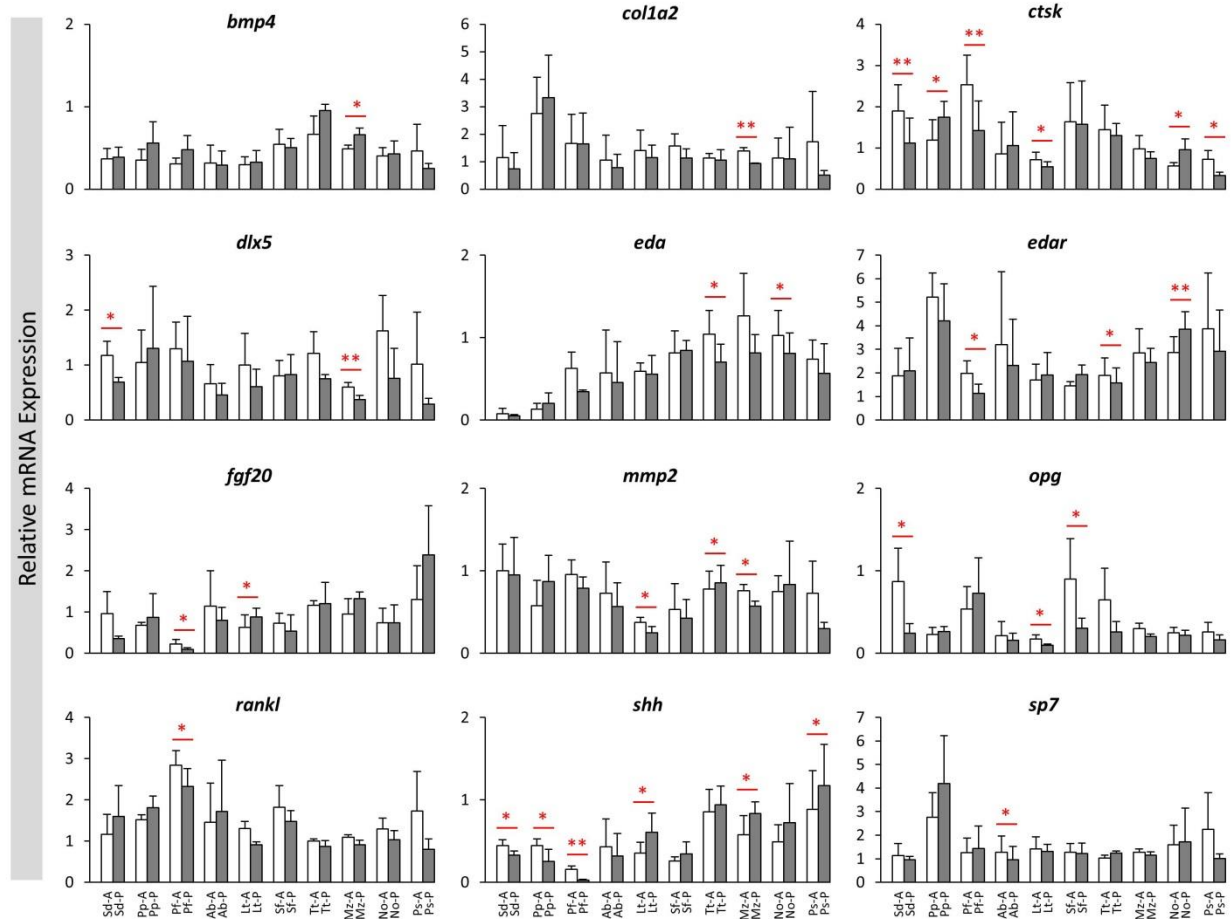

865

866 **Figure 3. The anterior versus posterior scales expression differences of the candidate**  
 867 **target genes in haplochromine cichlids from three East African lakes.**

868 Comparisons of relative expression levels between anterior versus posterior scales for 16  
 869 candidate target genes in different lakes in East Africa at young adult stage. Significant  
 870 differences between the are indicated by red asterisks (\*P < 0.05; \*\*P < 0.01). See Figure 1A  
 871 for corresponding species abbreviations.

872

873

874

875

876

877

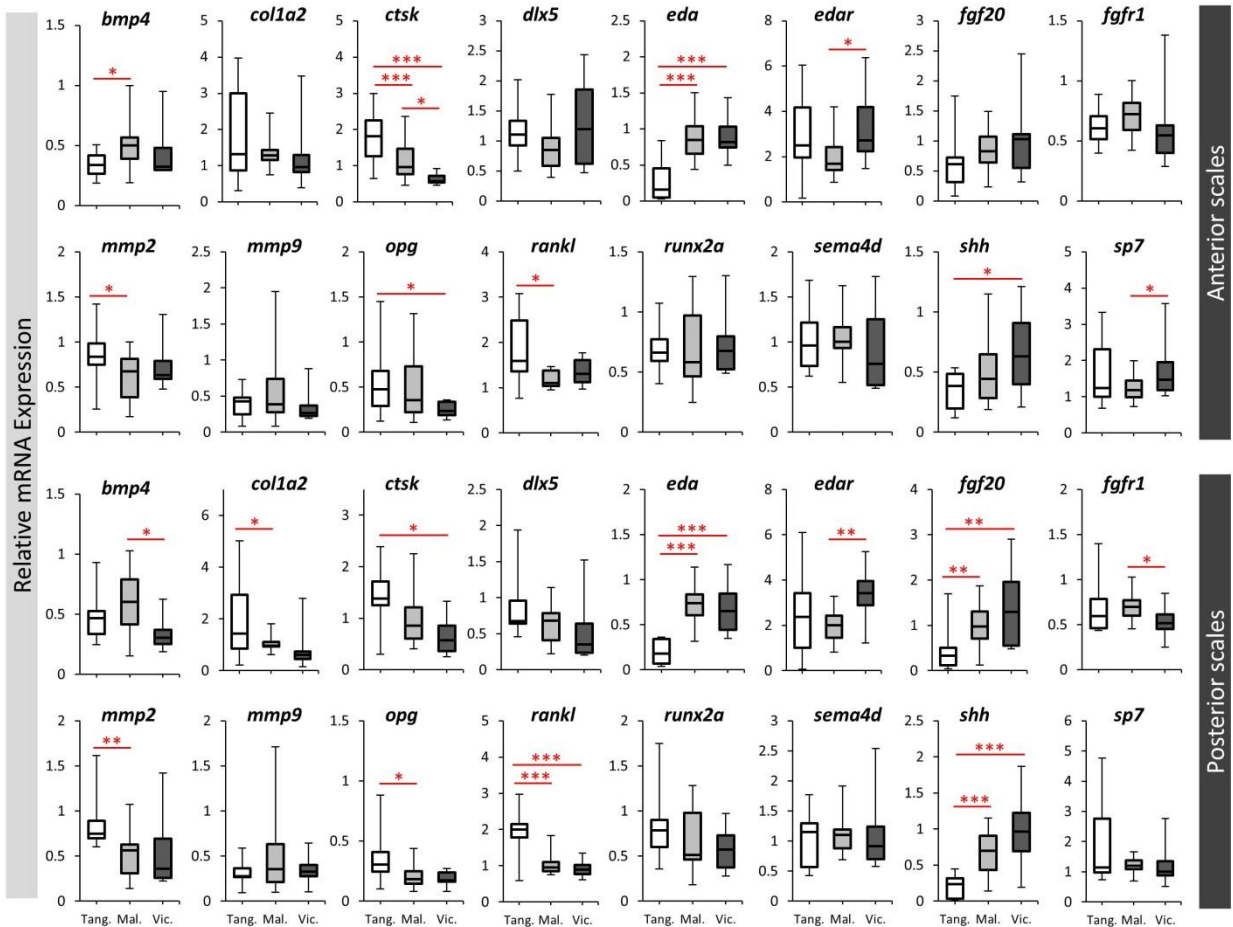

878

879 **Figure 4. The lake-based expression differences of the candidate target genes in**  
 880 **haplochromine cichlids in this study.**

881 Comparisons of relative expression levels between the lakes, when all species of each lake  
 882 were combined, within anterior or posterior scales for 16 candidate target genes. Significant  
 883 differences between the are indicated by red asterisks (\*P < 0.05; \*\*P < 0.01; \*\*\*P < 0.001).  
 884 See Figure 1A for corresponding species abbreviations.

885

886

887

888

889

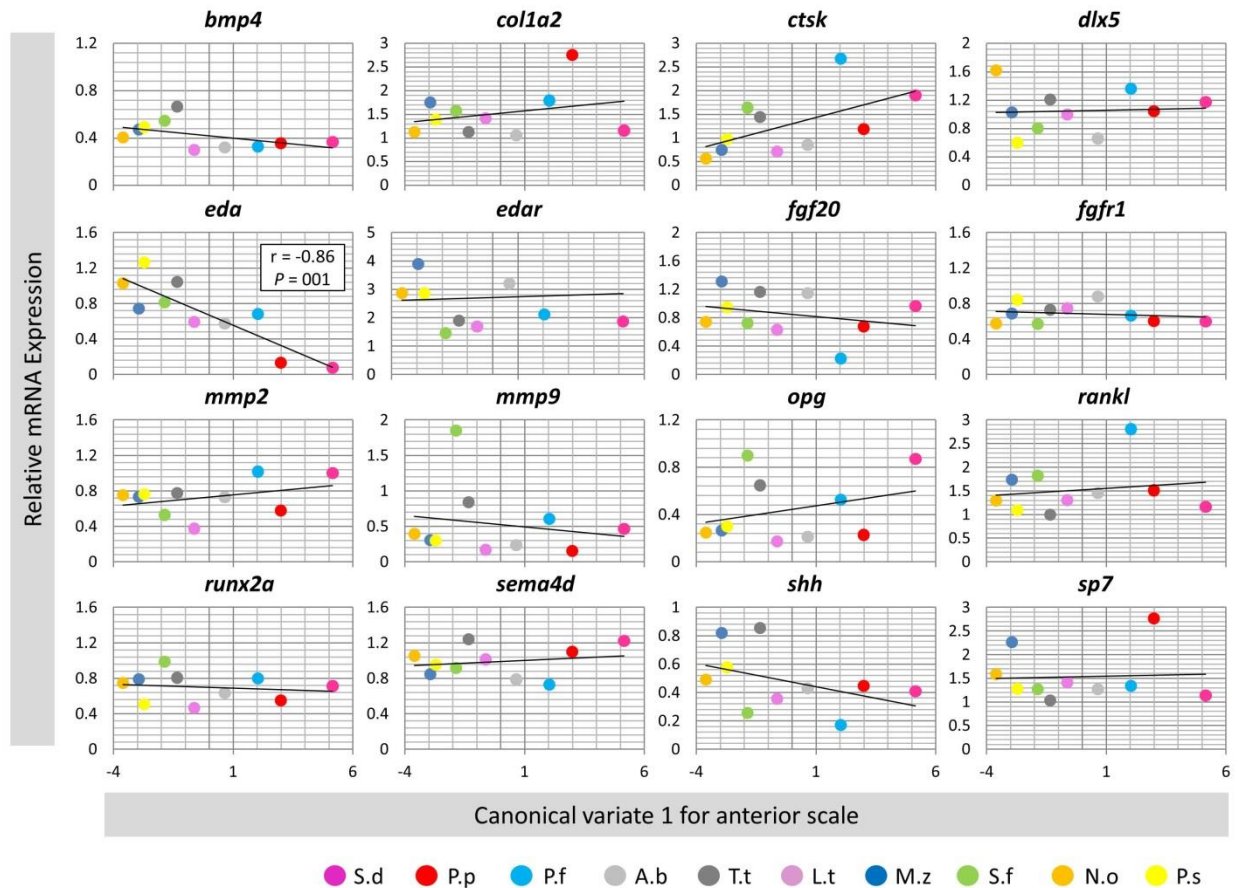

890

891 **Figure 5. Correlation analyses of candidate target gene expressions and the anterior**  
 892 **scale morphological divergence across the haplochromine species.**

893 A Pearson correlation coefficient ( $r$ ) was used to assess the similarity between differences in  
 894 expression level of the target genes and the major canonical variate in the anterior scales across  
 895 all species. See Figure 1A for corresponding species abbreviations.

896

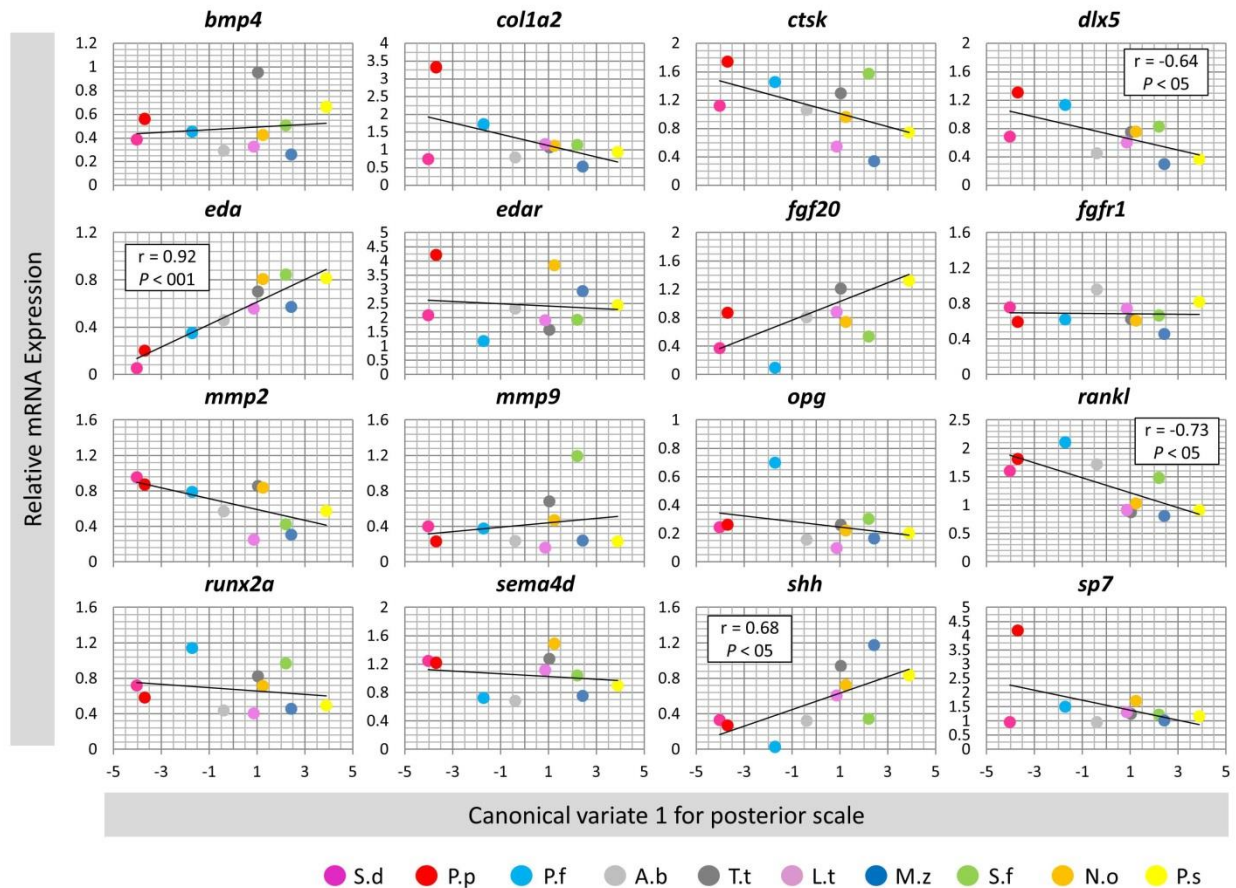

897

898 **Figure 6. Correlation analyses of candidate target gene expressions and the posterior**  
 899 **scale morphological divergence across the haplochromine species.**

900 A Pearson correlation coefficient ( $r$ ) was used to assess the similarity between differences in  
 901 expression level of the target genes and the major canonical variate in the posterior scales across  
 902 all species. See Figure 1A for corresponding species abbreviations.

903

904

905

906

907

908

909

910

911

912

913

914

915

916

917

918

919



920 **Table 1. Selected target genes involved in the development and/or morphogenesis of**  
 921 **scales in teleost fish.**

| Gene                       | Related functions                                                                                                                                                                         | Species                                       | References           |
|----------------------------|-------------------------------------------------------------------------------------------------------------------------------------------------------------------------------------------|-----------------------------------------------|----------------------|
| <i>bmp4</i>                | A ligand of the TGF- $\beta$ superfamily implicated in formation and calcification of elasmoid scale                                                                                      | zebrafish                                     | [94]                 |
| <i>coll1a2</i>             | A member of collagen family highly expressed in both developing and adult elasmoid scales and responsive to environmental changes                                                         | zebrafish                                     | [95, 96]             |
| <i>ctsk</i>                | A lysosomal cysteine proteinase involved in bone remodeling/resorption and expressed in in both developing and adult elasmoid scale and responsive to environmental changes               | zebrafish                                     | [81, 82, 96, 97]     |
| <i>dlx5</i>                | A homeobox transcription factor involved in bone development and scale formation and regeneration and responsive to environmental changes                                                 | zebrafish<br>goldfish                         | [80–82]              |
| <i>eda</i><br><i>edar</i>  | A tumor necrosis factor and its receptor mediating a signal involved in development of ectodermal organs and playing role in scale formation and morphogenesis                            | zebrafish<br>medaka<br>sculpin<br>stickleback | [19, 65, 67, 98, 99] |
| <i>fgf20</i>               | A fibroblast growth factor involved in formation of scale development and morphogenesis                                                                                                   | zebrafish                                     | [100, 101]           |
| <i>fgfr1</i>               | A conserved receptor of fibroblast growth factor involved in formation of scales during juvenile development and morphological changes of scales in adult                                 | zebrafish<br>carp<br>cichlid                  | [20, 102]            |
| <i>mmp2</i><br><i>mmp9</i> | Members of matrix metalloproteinases involved in development, regeneration and tissue remodeling of scale                                                                                 | zebrafish                                     | [103]                |
| <i>opg</i>                 | An osteoblast-secreted decoy receptor that functions as a negative regulator of bone resorption involved in scale formation and regeneration                                              | zebrafish<br>goldfish                         | [80, 81]             |
| <i>rankl</i>               | A ligand for <i>opg</i> and functions as a key factor for osteoclast differentiation bone remodeling involved in scale formation and regeneration and responsive to environmental changes | zebrafish<br>goldfish                         | [80, 81, 85, 86]     |
| <i>runx2a</i>              | A transcription factors essential for osteoblastic differentiation and skeletal morphogenesis involved in scale formation and regeneration and responsive to environmental changes        | zebrafish<br>goldfish                         | [80, 82, 104]        |
| <i>sema4d</i>              | A cell surface receptor involved in cell-cell signaling and scale formation and responsive to environmental changes                                                                       | zebrafish                                     | [81]                 |
| <i>shh</i>                 | A ligand of Hedgehog signaling pathway involved in the control of scale morphogenesis in relationship with the formation of the epidermal fold in the posterior region                    | zebrafish                                     | [16, 87]             |
| <i>sp7</i>                 | A bone specific transcription factor required for osteoblast differentiation and scale formation and regeneration                                                                         | zebrafish<br>carp<br>goldfish                 | [80, 87, 105]        |

922  
 923  
 924  
 925  
 926  
 927  
 928  
 929  
 930  
 931  
 932  
 933  
 934  
 935  
 936  
 937  
 938



939  
940  
941  
942  
943  
944  
945

**Table 2. Ranking of reference genes in anterior and posterior scales across all of the haplochromine species used in this study.**

SD indicates a ranking calculation based on standard deviation generated by BestKeeper, whereas SV, stability value, and M, mean expression stability value, are calculated by geNorm and NormFinder, respectively.

|   | Anterior scales |       |               |       |               |       | Posterior scales |       |               |       |               |       |
|---|-----------------|-------|---------------|-------|---------------|-------|------------------|-------|---------------|-------|---------------|-------|
|   | BestKeeper      |       | geNorm        |       | NormFinder    |       | BestKeeper       |       | geNorm        |       | NormFinder    |       |
|   | Ranks           | SD    | Ranks         | M     | Ranks         | SV    | Ranks            | SD    | Ranks         | M     | Ranks         | SV    |
| 1 | <i>actb1</i>    | 0.398 | <i>actb1</i>  | 1.110 | <i>actb1</i>  | 0.478 | <i>actb1</i>     | 0.421 | <i>actb1</i>  | 1.133 | <i>actb1</i>  | 0.435 |
| 2 | <i>rps11</i>    | 0.532 | <i>rps11</i>  | 1.168 | <i>rps11</i>  | 0.589 | <i>rps11</i>     | 0.571 | <i>rps11</i>  | 1.174 | <i>rps11</i>  | 0.471 |
| 3 | <i>rps18</i>    | 0.745 | <i>tbp</i>    | 1.256 | <i>tbp</i>    | 0.669 | <i>tbp</i>       | 0.804 | <i>tbp</i>    | 1.276 | <i>tbp</i>    | 0.705 |
| 4 | <i>tbp</i>      | 0.766 | <i>hsp90a</i> | 1.379 | <i>rps18</i>  | 0.708 | <i>hsp90a</i>    | 0.829 | <i>hsp90a</i> | 1.346 | <i>hsp90a</i> | 0.763 |
| 5 | <i>gapdh</i>    | 0.869 | <i>rps18</i>  | 1.396 | <i>hpri1</i>  | 0.871 | <i>rps18</i>     | 0.869 | <i>rps18</i>  | 1.536 | <i>rps18</i>  | 0.812 |
| 6 | <i>hsp90a</i>   | 0.882 | <i>hpri1</i>  | 1.590 | <i>hsp90a</i> | 0.879 | <i>gapdh</i>     | 1.003 | <i>gapdh</i>  | 1.703 | <i>hpri1</i>  | 0.918 |
| 7 | <i>hpri1</i>    | 0.929 | <i>gapdh</i>  | 1.631 | <i>gapdh</i>  | 1.227 | <i>hpri1</i>     | 1.089 | <i>hpri1</i>  | 1.729 | <i>gapdh</i>  | 1.215 |
| 8 | <i>elf1a</i>    | 1.507 | <i>elf1a</i>  | 1.827 | <i>elf1a</i>  | 1.420 | <i>elf1a</i>     | 1.362 | <i>elf1a</i>  | 1.754 | <i>elf1a</i>  | 1.310 |

946  
947  
948  
949

**Table 3. Identified genetic differences in regulatory sequences of *eda* gene and predicted binding sites for potential upstream regulators.**

PWD ID indicates positional weight matrix ID of a predicted binding site and E-values refer to matching similarity between the predicted motif sequences and the PWD IDs.

| Region                                  | Sequence       | Species        | TFBS | PWM ID   | E-value    |
|-----------------------------------------|----------------|----------------|------|----------|------------|
| <i>eda</i> 3'UTR                        | A-----A        | Ab, Sd, Pp, Pf | -    | -        | -          |
|                                         | AAAAATAGCTA    | All the others | Mef2 | M00941   | 2.1296e-12 |
| <i>eda</i> 3'UTR                        | GAATAGATTAAC   | Sd, Pp, Pf     | -    | -        | -          |
|                                         | GAATATATTAAC   | All the others | Tcf1 | MA0046.1 | 2.6516e-06 |
| <i>eda</i> / <i>tnfsf13b</i> Intergenic | ACTT-----GCGAG | Sd             | Lef1 | M00805   | 2.4053e-06 |
|                                         | ACTTGGACTGCGAG | Pp, Pf         | Lef1 | M00805   | 5.1356e-05 |
|                                         | ACTTCGACTGCGAG | Ab             | -    | -        | -          |
|                                         | ACTTCAACTGCGAG | All the others | -    | -        | -          |

954  
955  
956

**Additional file 1.xls.** Information about qPCR primers used in this study.

958
